# Supplementary material
Source: PubMed Central journal article supplement (PMC4731294)

**Figure e-1.** Selection of medically intractable patient cohort, 2001 to 2010

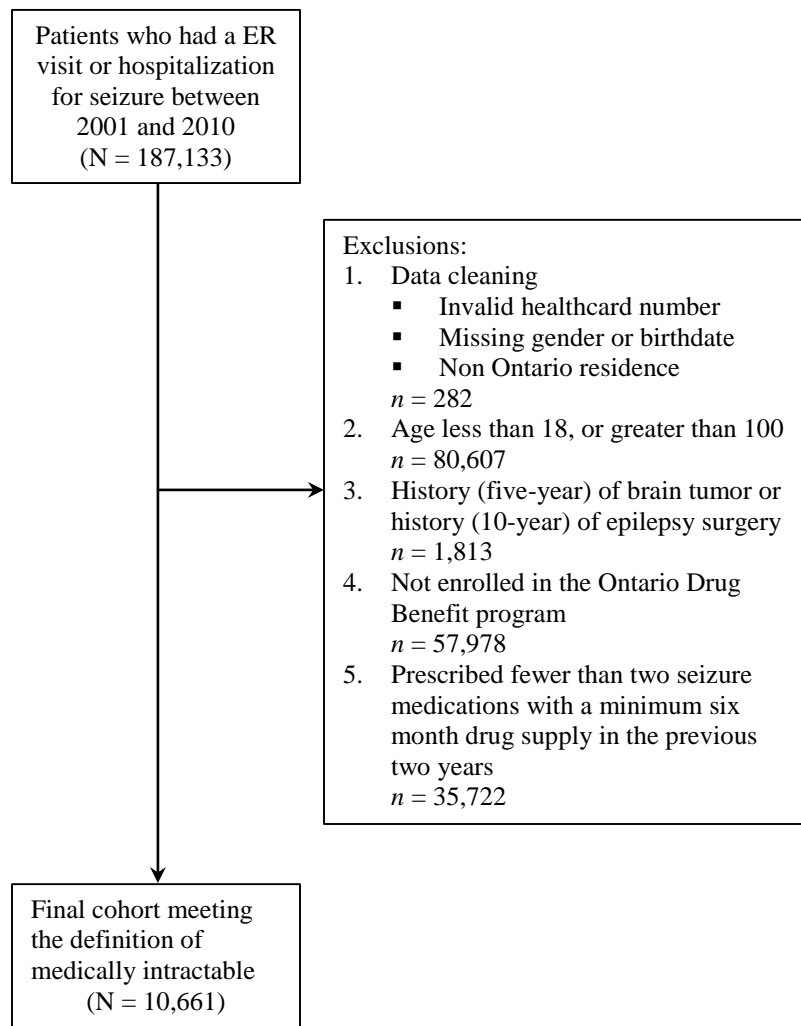

Supplement: supp_WNL.0000000000002249_Figure_e-1.pdf [file supp_WNL.0000000000002249_Figure_e-1.pdf]
